# Supplementary material for: Roles of both amines and acid in supramolecular hydrogel formation of tetracarboxyl acid-appended calix[4]arene gelator
Source: Royal Society of Chemistry journal article supplement (doi:10.1039/c5ra00685f), 2015-01-01
Supplement: c5ra00685f1.pdf [file c5ra00685f1.pdf]

Electronic Supplementary Information (ESI)

## **Roles of both amines and acid in supramolecular hydrogel formation of tetracarboxyl acids-appended calix[4]arene gelator**

*HeeKyoung Choi, Ji Ha Lee and Jong Hwa Jung*

Department of Chemistry and Research Institute of Natural Sciences, Gyeongsang National University,  
Jinju 660-701, Korea.

E-mail: [jonghwa@gnu.ac.kr](mailto:jonghwa@gnu.ac.kr)

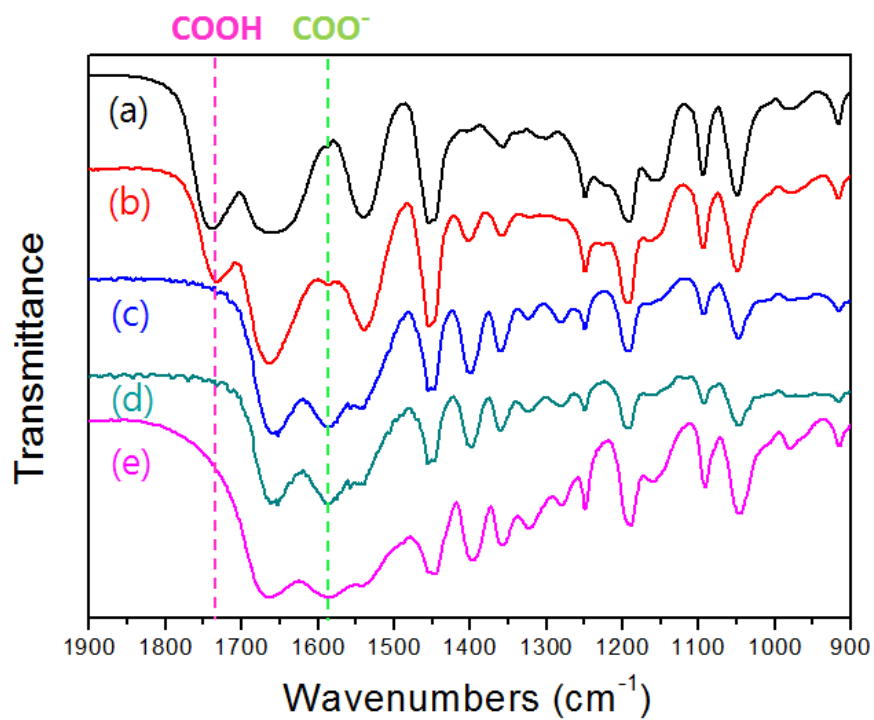

**Fig. S1** FT IR spectra of **1** (a) without and with (b) 1.0, (c) 2.0, (d) 3.0 and (e) 4.0 equivalents of diaminobutane.

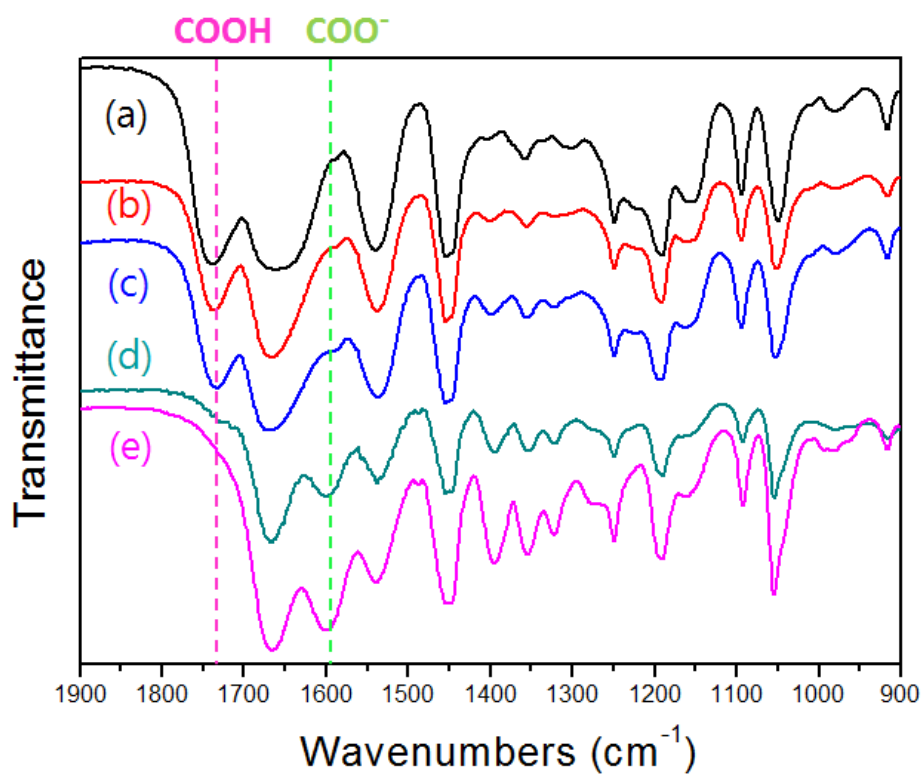

**Fig. S2** FT IR spectra of **1** (a) without and with (b) 1.0, (c) 2.0, (d) 3.0 and (e) 4.0 equivalents of monoaminobutane.

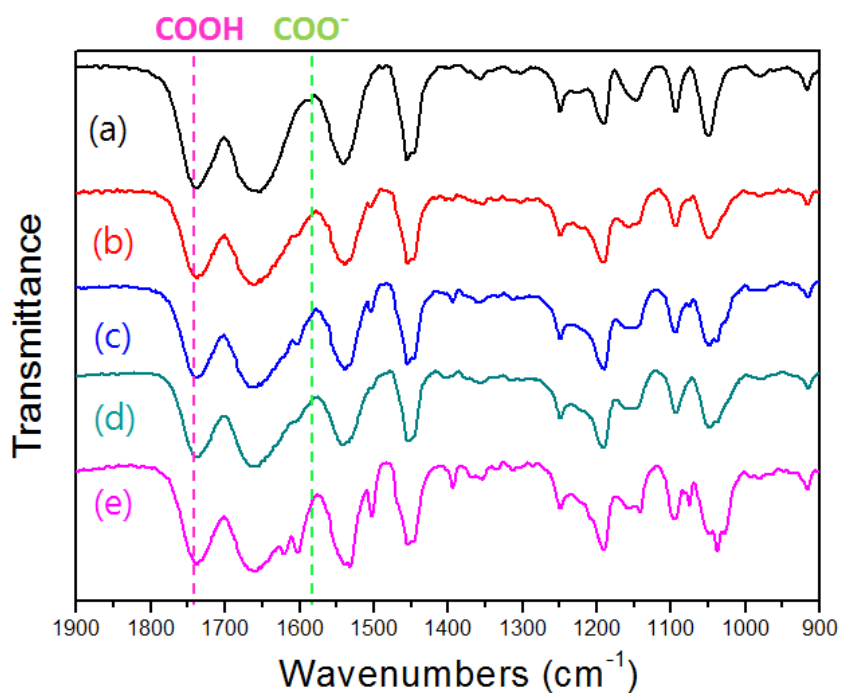

**Fig. S3** FT IR spectra of **1** without (a) and with (b-e) diaminobutane (b: 1 equiv., c: 2 equiv., d: 3 equiv. and e: 4 equiv.) in the presence of HCl (2 equiv.).

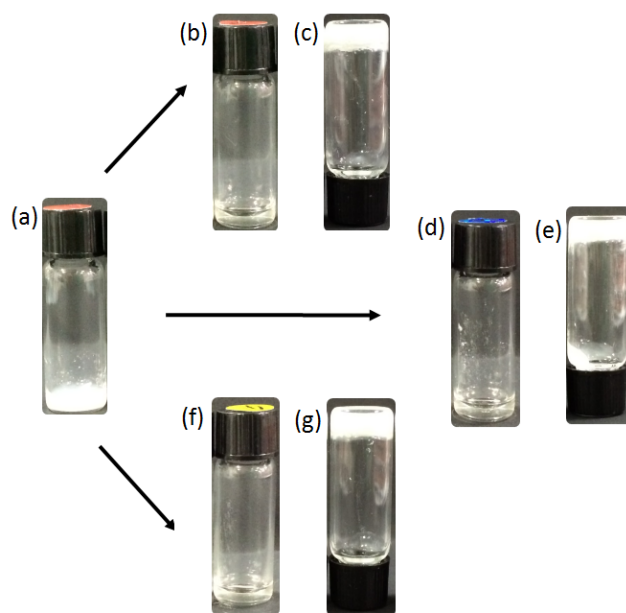

**Fig. S4** Photographs of (a) **1**, (b) **1**+DABCO (4 equiv.), (c) **1**+DABCO (4 equiv.)+HCl (2 equiv.), (d) **1**+N,N'-dimethylppiperazine (4 equiv.), (e) **1**+N,N'-dimethylppiperazine (4 equiv.)+HCl (2 equiv.), (f) **1**+TMEA (4 equiv.) and (g) **1**+TMEA (4 equiv.)+HCl (2 equiv.).

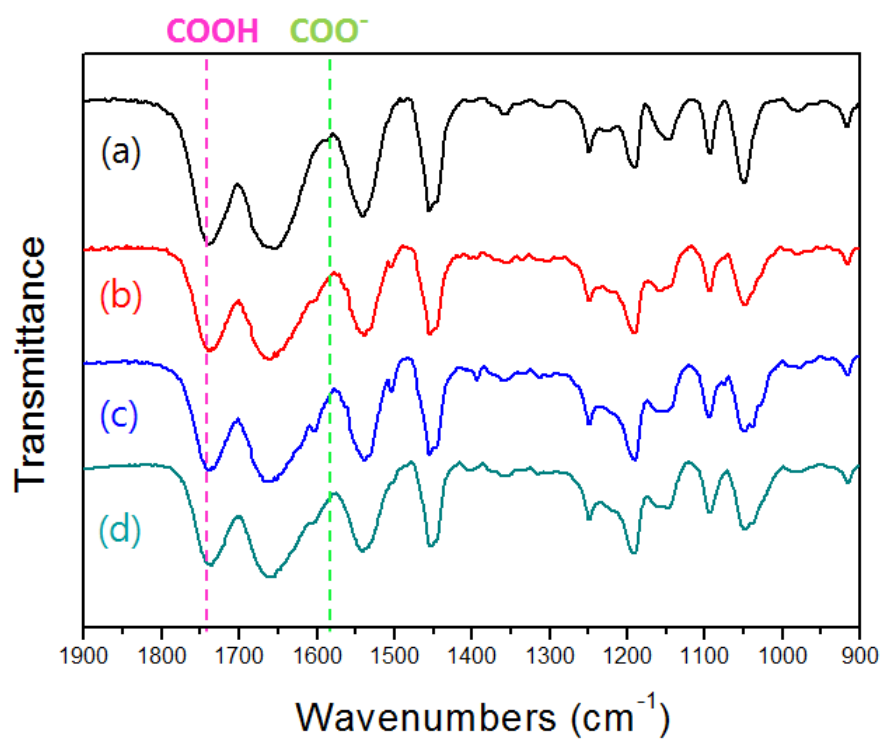

**Fig. S5** FT IR spectra of (a) **1**, (b) **1**+DABCO (4 equiv.)+HCl (2 equiv), (c) **1**+N,N'-dimethylpiperazine (4 equiv.)+HCl (2 equiv.) and (d) **1**+TMEA (4 equiv.)+HCl (2 equiv.).

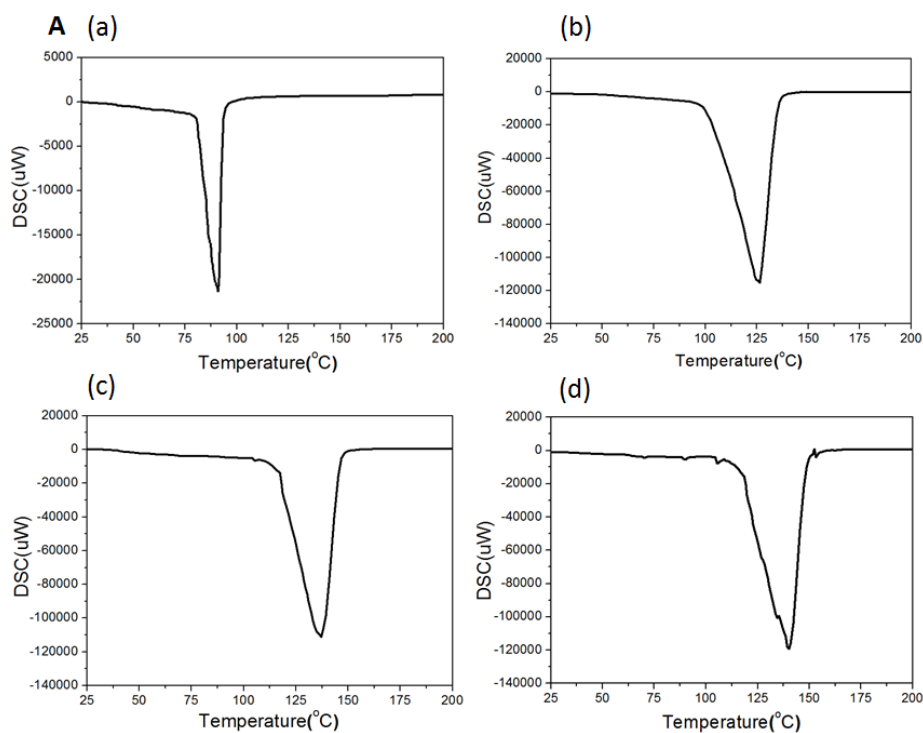

**Fig. S6** DSC thermograms of (a) **1**+diaminobutane (1 equiv.)+HCl (2 equiv.), (b) **1**+diaminobutane (2 equiv.)+HCl (2 equiv.), (c) **1**+diaminobutane (3 equiv.)+HCl (2 equiv.) and (d) **1**+diaminobutane (4 equiv.)+HCl (2 equiv.).

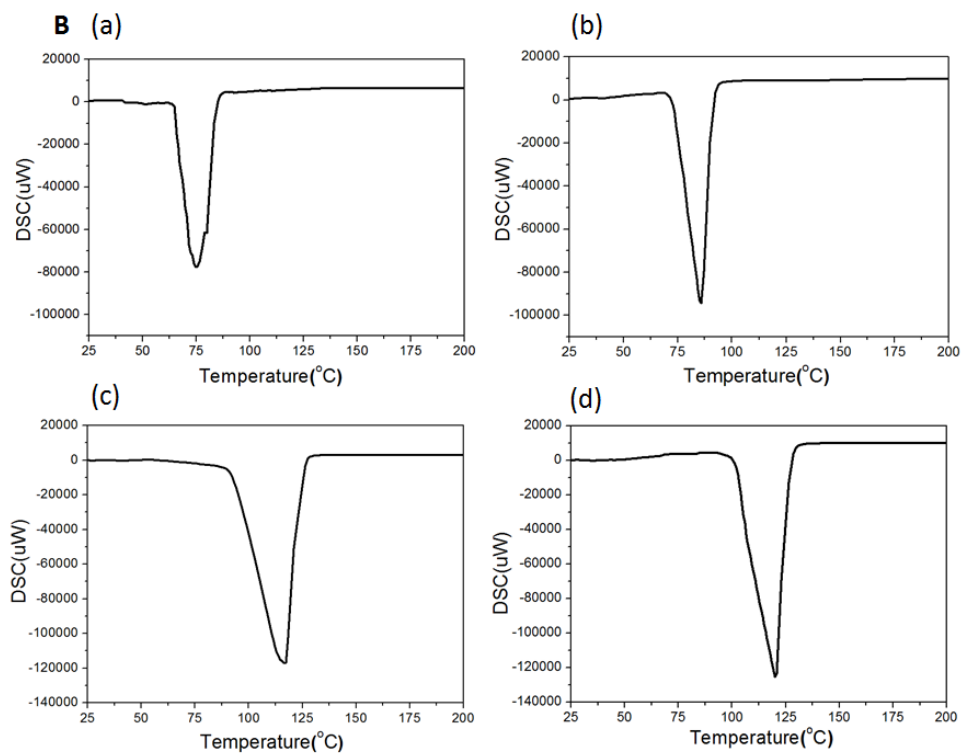

**Fig. S7** DSC thermograms of (a) **1**+monoaminobutane (1 equiv.)+HCl (2 equiv.), (b) **1**+monoaminobutane (2 equiv.)+HCl (2 equiv.), (c) **1**+monoaminobutane (3 equiv.)+HCl (2 equiv.) and (d) **1**+monoaminobutane (4 equiv.)+HCl (2 equiv.).

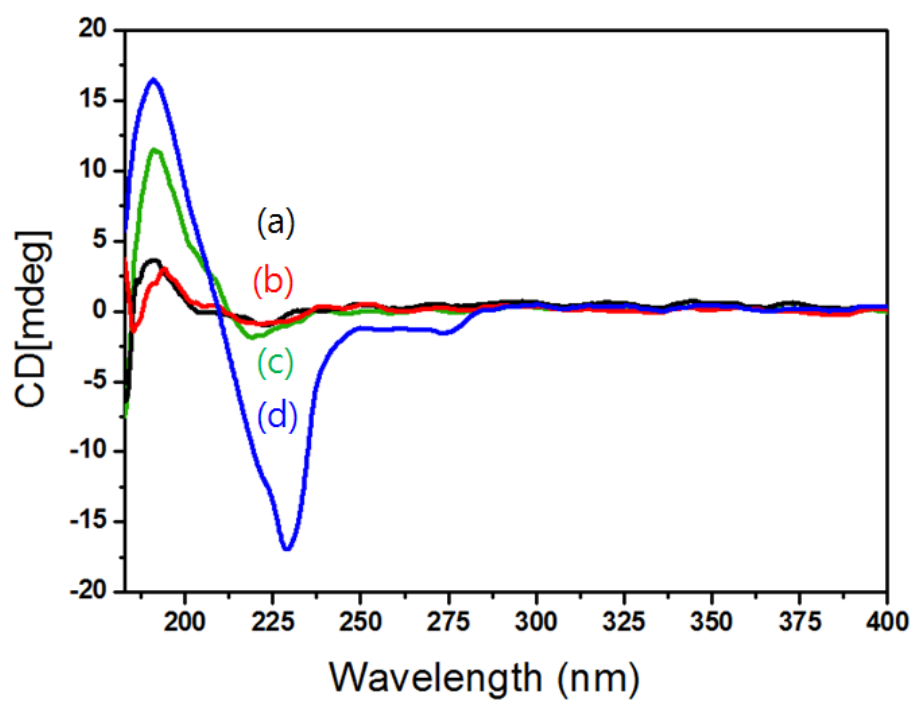

**Fig. S8** CD spectra of (a) **1**+diaminobutane (1 equiv.)+HCl (2 equiv.), (b) **1**+ diaminobutane (2 equiv.)+HCl (2 equiv.), (c) **1**+ diaminobutane (3 equiv.)+HCl (2 equiv.), (d) **1**+ diaminobutane (4 equiv.)+HCl (2 equiv.).

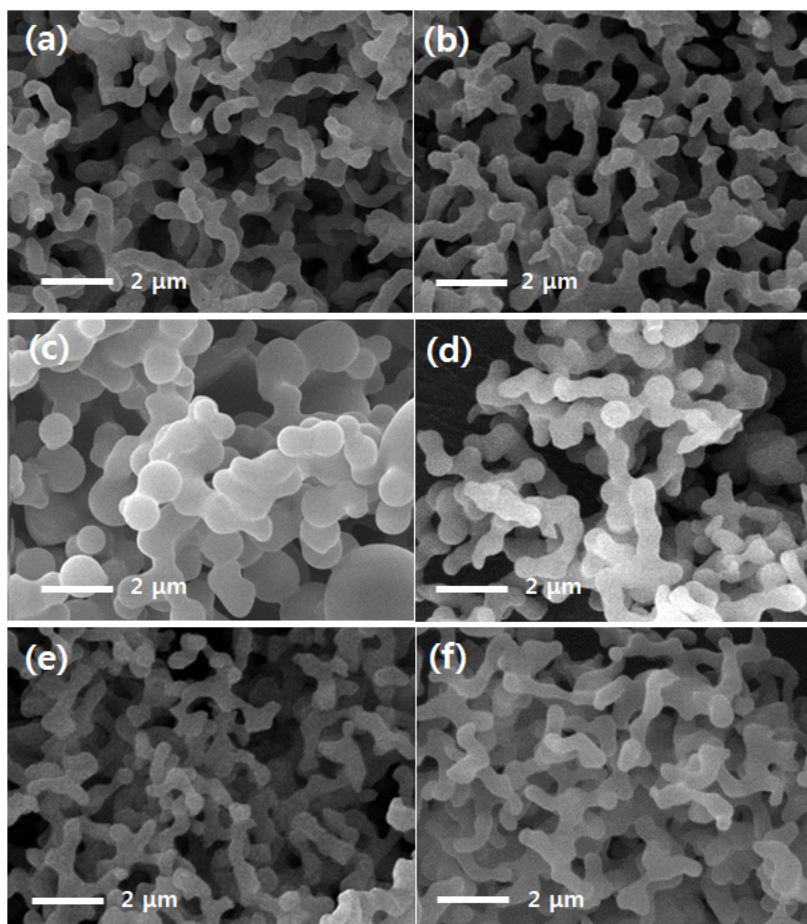

**Fig. S9** SEM images of (a) **1**+diaminobutane (2 equiv.)+HCl (2 equiv.), (b) **1**+ diaminobutane (3 equiv.)+HCl (2 equiv.), (c) **1**+ monoaminobutane (2 equiv.)+HCl (2 equiv.), (d) **1**+ monoaminobutane (3 equiv.)+HCl (2 equiv.), (e) **1**+ DABCO (2 equiv.)+HCl (2 equiv.) and (f) **1**+ DABCO (3 equiv.)+HCl (2 equiv.).

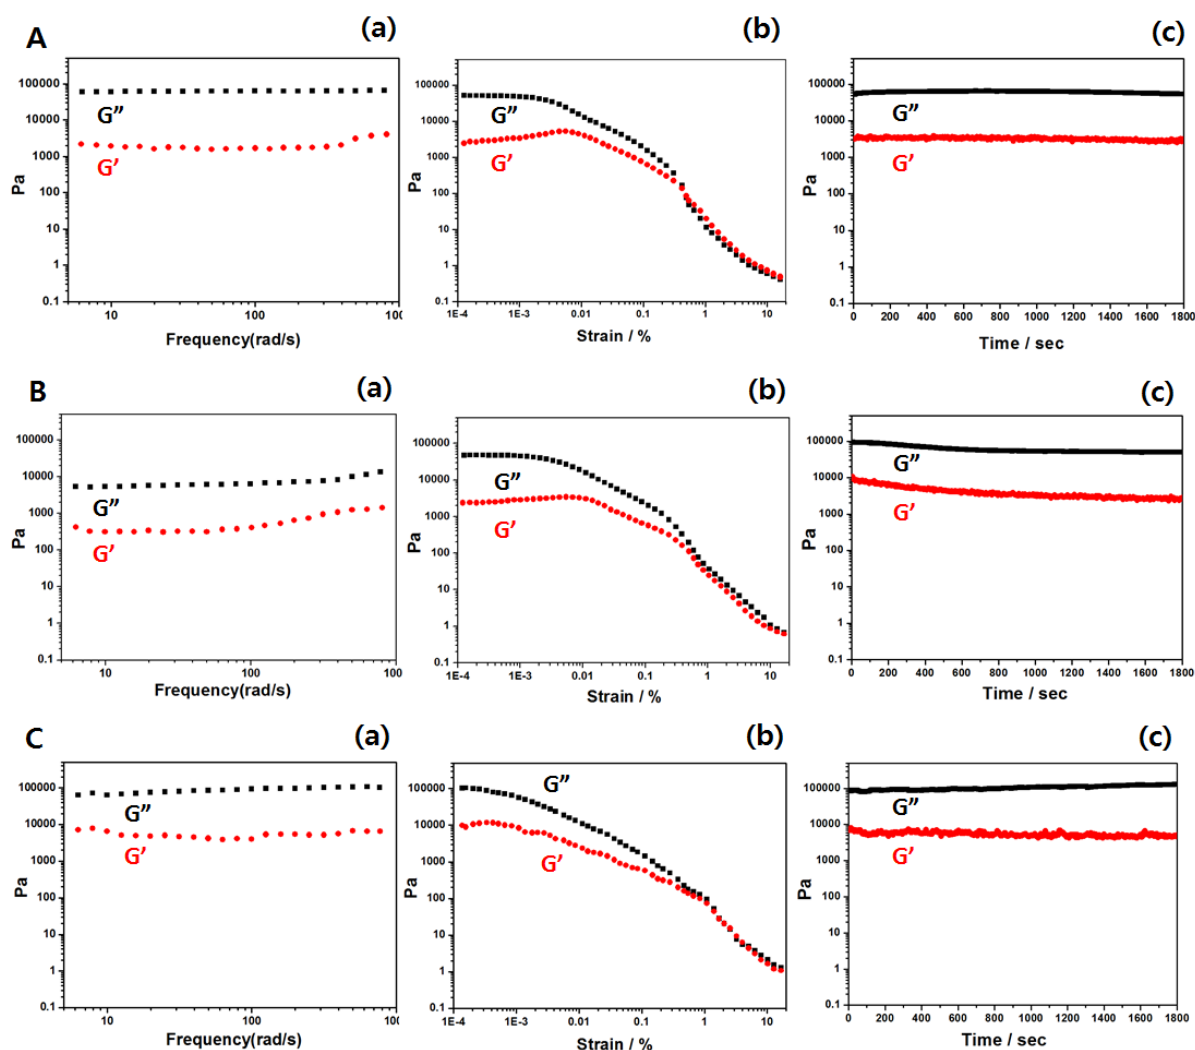

**Fig. S10** Rheological data. (A) hydrogel **1** with diaminobutane (4 equiv.) and HCl (2 equiv.), (B) hydrogel **1** with monoaminobutane (4 equiv.) and HCl (2 equiv.) and (C) hydrogel **1** with DABCO (4 equiv.) and HCl (2 equiv.). (a) Frequency dependences of elastic modulus (red line;  $G'$ ) and viscous modulus (black line,  $G''$ ), (b) Strain dependence of elastic modulus (red line;  $G'$ ) and viscous modulus (black line,  $G''$ ) at a frequency of  $1 \text{ rads}^{-1}$  and (c) time dependence of elastic modulus (red line;  $G'$ ) and viscous modulus (black line,  $G''$ ) at the heating rate of  $1 \text{ }^\circ\text{C min}^{-1}$ , strain of  $0.1 \text{ }%$  and frequency of  $1 \text{ rad s}^{-1}$ .



**Table S1.** Amount of –COOH and COO<sup>-</sup> species of **1** in the different concentration of diaminobutane.

| diaminobutane | Sol 1            |      |
|---------------|------------------|------|
|               | COO <sup>-</sup> | COOH |
| 0 equiv.      | 22 %             | 78 % |
| 1 equiv.      | 48 %             | 52 % |
| 2 equiv.      | 100 %            | 0    |
| 3 equiv.      | 100 %            | 0    |
| 4 equiv.      | 100 %            | 0    |

**Table S2.** Amount of –COOH and COO<sup>-</sup> species of **1** in the different concentration of monoaminobutane.

| monoaminobutane | Sol 1            |      |
|-----------------|------------------|------|
|                 | COO <sup>-</sup> | COOH |
| 0 equiv.        | 22 %             | 78 % |
| 1 equiv.        | 27 %             | 73 % |
| 2 equiv.        | 35 %             | 65 % |
| 3 equiv.        | 100 %            | 0    |
| 4 equiv.        | 100 %            | 0    |

**Table S3.** Amount of  $\text{-COOH}$  and  $\text{COO}^-$  species of **1** in the different concentration of DABCO.

| DABCO    | Sol 1          |               |
|----------|----------------|---------------|
|          | $\text{COO}^-$ | $\text{COOH}$ |
| 0 equiv. | 22 %           | 78 %          |
| 1 equiv. | 52 %           | 48 %          |
| 2 equiv. | 100 %          | 0             |
| 3 equiv. | 100 %          | 0             |
| 4 equiv. | 100 %          | 0             |
